# Supplementary material for: Quantification of Oligonucleotides Using Tandem Mass Spectrometry with Isobaric Internal Standards
Source: MDPI journal article supplement (doi:10.3390/ijms241914691), 2023-09-28
Supplement: s1 [file s1]

# **Supplemental Information**

for

Quantification of oligonucleotides by isobaric internal  
standards using tandem mass spectrometry

by

Christopher Gawlig, G ng r Hanci and Michael R hl

|                                                                                                                                                     |    |
|-----------------------------------------------------------------------------------------------------------------------------------------------------|----|
| 1. DoE parameter optimization.....                                                                                                                  | 3  |
| Table S1: Runs performed for intensity optimisation with respective results for ion at m/z = 690.6 .....                                            | 3  |
| Figure S1: Contour plot of DOE results.....                                                                                                         | 5  |
| 2. MSMS Quantification of non-thiolated Oligonucleotides .....                                                                                      | 6  |
| Figure S2: Calibration curve of isobaric pair 2 via intensity.....                                                                                  | 6  |
| Table S2: Raw data for creation of calibration curve in Figure S1 via signal intensity (An = analyte; IS = internal standard).....                  | 6  |
| Figure S3: Calibration curve of isobaric pair 2 via MRM TIC area. ....                                                                              | 7  |
| Table S3: Raw data for creation of calibration curve in Figure S2 via MRM TIC area (An = analyte; IS = internal standard).....                      | 7  |
| 3. Method Qualification – Linearity .....                                                                                                           | 8  |
| Figure S4: Calibration curve of isobaric pair 1 via intensity.....                                                                                  | 8  |
| Table S4: Raw data for creation of calibration curve in Figure S3 signal intensity (An = analyte; IS = internal standard).....                      | 8  |
| Figure S5: Calibration curve of isobaric pair 1 via MRM TIC area. (see Figure 4).....                                                               | 9  |
| Table S5: Raw data for creation of calibration curve in Figure S4 via MRM TIC area (An = analyte; IS = internal standard).....                      | 9  |
| 4. Method Qualification – Sensitivity.....                                                                                                          | 10 |
| Figure S6: Sensitivity experiments of isobaric pair 1 analyte via MRM TIC area on a logarithmic scale. With LLOQ of 1 ng/ml. ....                   | 10 |
| Table S6: Raw data for sensitivity experiment in Figure S5 via MRM TIC area (An = analyte; IS = internal standard).....                             | 10 |
| Table S6: Raw data for precision determination of LLOQ in Figure S5 via MRM TIC area (An = analyte; IS = internal standard).....                    | 10 |
| 5. Method Qualification – Accuracy & Precision.....                                                                                                 | 11 |
| Figure S7: Calibration curve of isobaric pair 1 via MRM TIC area; non-extracted. (see Figure 5) .....                                               | 11 |
| Figure S8: Calibration curve of isobaric pair 1 via MRM TIC area; extracted from bovine plasma. (see Figure 5) .....                                | 11 |
| Table S8: Raw data for non-extracted calibration curve in Figure S6 via MRM TIC area (An = analyte; IS = internal standard).....                    | 12 |
| Table S9: Raw data for calibration curve extracted from bovine plasma in Figure S7 via MRM TIC area (An = analyte; IS = internal standard). ....    | 12 |
| Table S10: Raw data for sample testing extracted from water in Figure S6 & S7 via MRM TIC area (An = analyte; IS = internal standard). ....         | 12 |
| Table S11: Raw data for sample testing extracted from bovine plasma in Figure S6 & S7 via MRM TIC area (An = analyte; IS = internal standard). .... | 12 |
| Table S12: Raw data for precision calculation by triplicate replica from analyte sample testing.....                                                | 13 |
| 6. Method Qualification – Short term biofluid stability study.....                                                                                  | 13 |
| Table S13: Raw data for biofluid stability study in bovine plasma via MRM TIC area; set 1 (An = analyte; IS = internal standard).....               | 13 |
| Table S14: Raw data for biofluid stability study in bovine plasma via MRM TIC area; set 2 (An = analyte; IS = internal standard).....               | 14 |

Table S15: Raw data for biofluid stability study in bovine plasma via MRM TIC area; set 3 (An = analyte; IS = internal standard)..... 14

## 1. DoE parameter optimization

For optimal MS-parameters, we assessed the critical parameters influencing the intensity of one of the charge states of our molecule. For this purpose, we were using the software MODDE Version 13. We used the screening objective with full factorial design with interactions. The runs used to build the model are shown in supplementary table 1. Figure S1 shows the Contour plot of the DoE experiments calculated by MODDE software. Best results were considered for final method settings. See Material and methods. The optimizations were all performed with Precursor 690 m/z ( $z = 7$ ). The optimizations were all performed with Precursor 690 m/z ( $z = 7$ ). However, the use of other charge states is also possible and results in equivalent fragment spectra. As an example, a comparison of the MSMS spectra of precursor 690 m/z and 805 m/z was compared in Figure S1. Here, the fragments 465 m/z & 485 m/z relevant for quantification are clearly visible.

Table S1: Runs performed for intensity optimisation with respective results for ion at m/z = 690.6

| Run order | Exp Name | Source temperature [°C] | Capillary voltage [kV] | Cone voltage [V] | Desolvation temperature [°C] | Desolvation gas flow [L/h] | Intensity of 690.6 m/z |
|-----------|----------|-------------------------|------------------------|------------------|------------------------------|----------------------------|------------------------|
| 1         | N9       | 80                      | 2.8                    | 40               | 500                          | 725                        | 19825                  |
| 2         | N11      | 80                      | 3.2                    | 40               | 500                          | 725                        | 29093                  |
| 3         | N27      | 80                      | 3.2                    | 40               | 500                          | 775                        | 17335                  |
| 4         | N21      | 80                      | 2.8                    | 60               | 450                          | 775                        | 18026                  |
| 5         | N35      | 100                     | 3.0                    | 50               | 475                          | 750                        | 12513                  |
| 6         | N17      | 80                      | 2.8                    | 40               | 450                          | 775                        | 10839                  |
| 7         | N15      | 80                      | 3.2                    | 60               | 500                          | 725                        | 19488                  |
| 8         | N8       | 120                     | 3.2                    | 60               | 450                          | 725                        |                        |
| 9         | N18      | 120                     | 2.8                    | 40               | 450                          | 775                        | 14946                  |
| 10        | N33      | 100                     | 3.0                    | 50               | 475                          | 750                        | 13748                  |
| 11        | N24      | 120                     | 3.2                    | 60               | 450                          | 775                        | 15600                  |
| 12        | N10      | 120                     | 2.8                    | 40               | 500                          | 725                        | 20146                  |
| 13        | N23      | 80                      | 3.2                    | 60               | 450                          | 775                        | 16407                  |
| 14        | N32      | 120                     | 3.2                    | 60               | 500                          | 775                        | 16391                  |
| 15        | N25      | 80                      | 2.8                    | 40               | 500                          | 775                        | 22271                  |
| 16        | N12      | 120                     | 3.2                    | 40               | 500                          | 725                        | 24479                  |
| 17        | N29      | 80                      | 2.8                    | 60               | 500                          | 775                        | 13354                  |
| 18        | N2       | 120                     | 2.8                    | 40               | 450                          | 725                        | 26737                  |
| 19        | N7       | 80                      | 3.2                    | 60               | 450                          | 725                        | 24079                  |
| 20        | N19      | 80                      | 3.2                    | 40               | 450                          | 775                        | 15007                  |
| 21        | N31      | 80                      | 3.2                    | 60               | 500                          | 775                        | 18303                  |
| 22        | N14      | 120                     | 2.8                    | 60               | 500                          | 725                        | 19481                  |
| 23        | N3       | 80                      | 3.2                    | 40               | 450                          | 725                        | 30323                  |
| 24        | N30      | 120                     | 2.8                    | 60               | 500                          | 775                        | 14311                  |
| 25        | N1       | 80                      | 2.8                    | 40               | 450                          | 725                        | 26263                  |
| 26        | N20      | 120                     | 3.2                    | 40               | 450                          | 775                        | 18005                  |
| 27        | N13      | 80                      | 2.8                    | 60               | 500                          | 725                        | 17320                  |
| 28        | N22      | 120                     | 2.8                    | 60               | 450                          | 775                        | 18053                  |
| 29        | N26      | 120                     | 2.8                    | 40               | 500                          | 775                        | 19403                  |
| 30        | N5       | 80                      | 2.8                    | 60               | 450                          | 725                        | 18336                  |
| 31        | N28      | 120                     | 3.2                    | 40               | 500                          | 775                        | 17444                  |
| 32        | N4       | 120                     | 3.2                    | 40               | 450                          | 725                        | 24337                  |
| 33        | N34      | 100                     | 3.0                    | 50               | 475                          | 750                        | 13365                  |
| 34        | N6       | 120                     | 2.8                    | 60               | 450                          | 725                        | 16409                  |
| 35        | N16      | 120                     | 3.2                    | 60               | 500                          | 725                        | 19488                  |
|           |          |                         |                        |                  |                              |                            |                        |

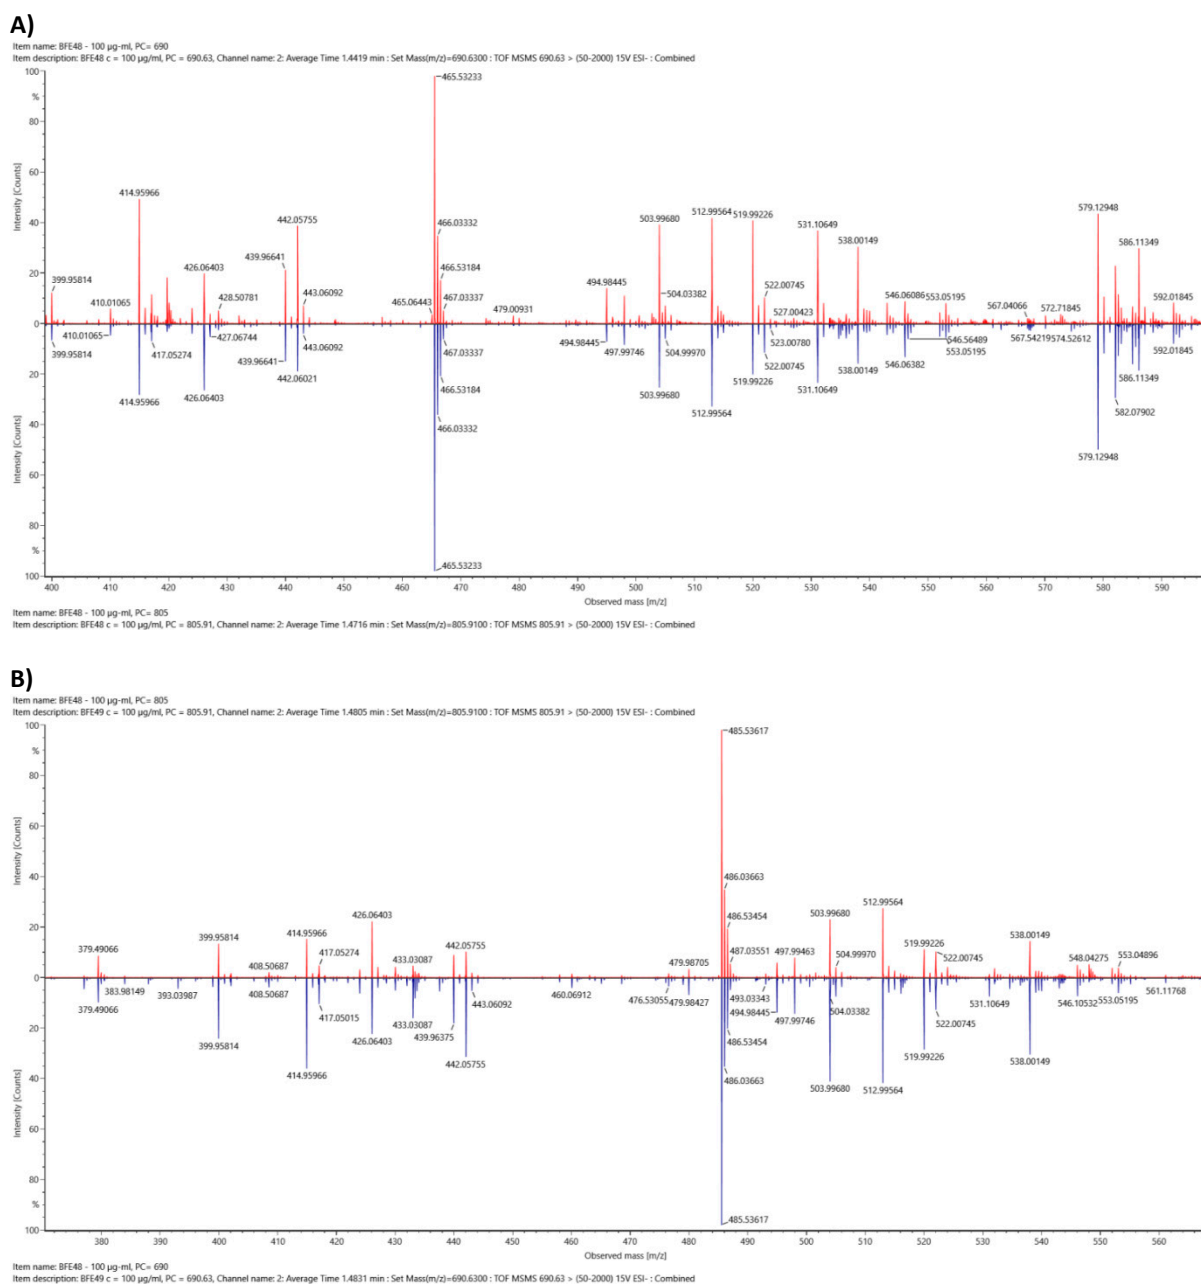

Figure S1: Comparison of the fragment spectra of the 690 m/z and 805 m/z precursors. **A:** Mass range with the fragment 465 m/z from precursor 805 m/z (top) and 690 m/z (bottom), which is relevant for quantification. **B:** Mass range with the fragment 485 m/z from Precursor 805 m/z (top) and 690 m/z (bottom) that is relevant for quantification.

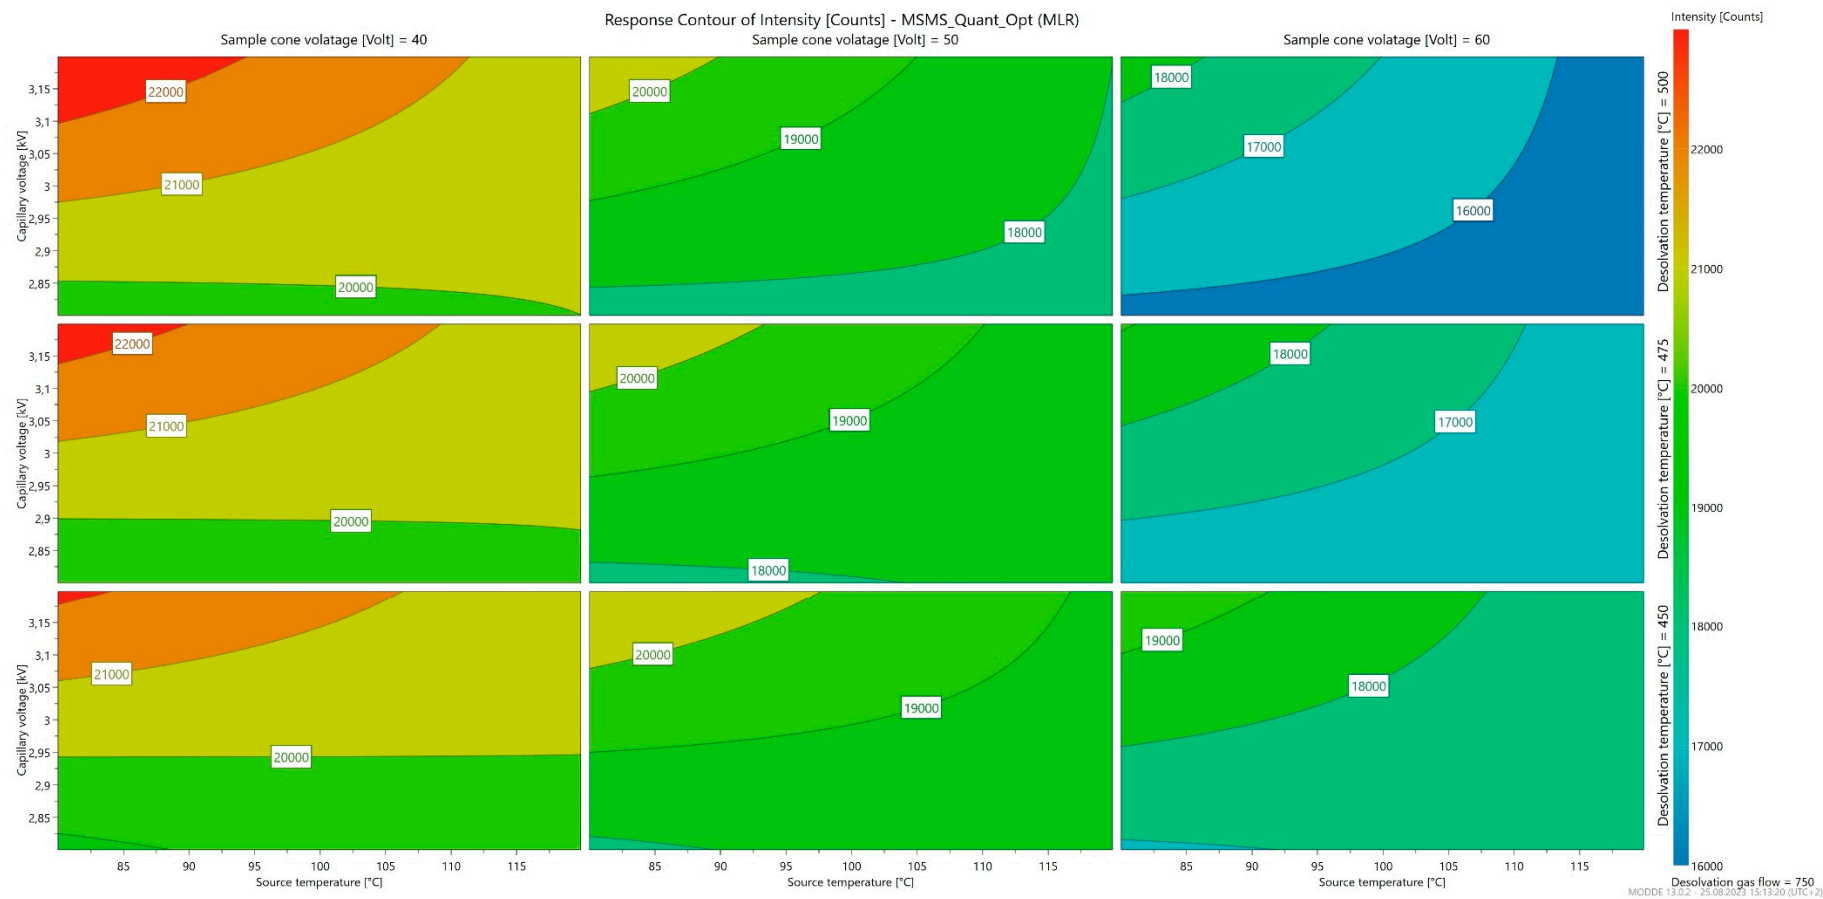

Figure S2: Contour plot of DOE results.

## 2. MSMS Quantification of non-thiolated Oligonucleotides

In addition to the isobaric pair used in the publication, proof of principle was also performed with a non-thiolated oligonucleotide pair (Chapter 4.1, Table 2). In this case, the MRM TIC area was calibrated via the signal intensity and the MRM TIC area. It was found that a linear trend line cannot be applied to the data points when calibrating via the intensity. Instead, the curve can be described via a power equation. This can also be seen in the case of the thiolated oligonucleotide pair, which is why calibration via MRM TIC areas also appears to make more sense in this case.

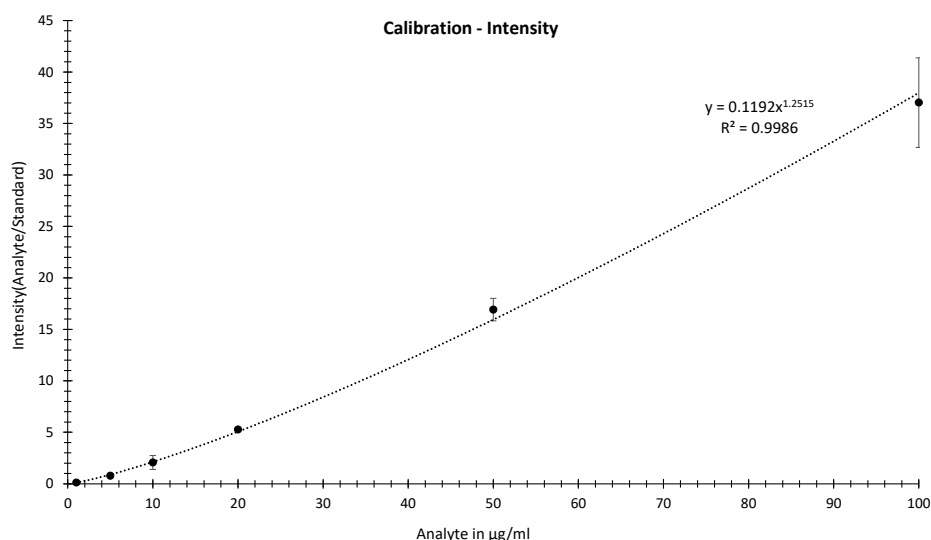

Figure S3: Calibration curve of isobaric pair 2 via intensity.

Table S2: Raw data for creation of calibration curve in Figure S1 via signal intensity (An = analyte; IS = internal standard).

| Calibration I - Intensity |           |         |                      |         |                      |                    |                                      |                                     |
|---------------------------|-----------|---------|----------------------|---------|----------------------|--------------------|--------------------------------------|-------------------------------------|
| Measurement               | c(An)     | I(An)   | $\bar{X}(\text{An})$ | I(IS)   | $\bar{X}(\text{IS})$ | ratio[I(An)/I(IS)] | $\bar{X}[I(\text{An})/I(\text{IS})]$ | $\sigma[I(\text{An})/I(\text{IS})]$ |
| 1                         | 1 µg/ml   | 154057  | 135573               | 1617497 | 1126962              | 0.095244072        | 0.126702593                          | 0.027824794                         |
| 2                         |           | 133743  |                      | 1325702 |                      | 0.100884663        |                                      |                                     |
| 3                         |           | 133849  |                      | 989243  |                      | 0.13530447         |                                      |                                     |
| 4                         |           | 127185  |                      | 898843  |                      | 0.141498571        |                                      |                                     |
| 5                         |           | 129031  |                      | 803525  |                      | 0.160581189        |                                      |                                     |
| 1                         | 5 µg/ml   | 693420  | 715918.4             | 1005906 | 900669               | 0.689348707        | 0.798185865                          | 0.06409279                          |
| 2                         |           | 730382  |                      | 862749  |                      | 0.846575308        |                                      |                                     |
| 3                         |           | 725998  |                      | 890747  |                      | 0.815044002        |                                      |                                     |
| 4                         |           | 730693  |                      | 867337  |                      | 0.842455701        |                                      |                                     |
| 5                         |           | 699099  |                      | 876607  |                      | 0.79750561         |                                      |                                     |
| 1                         | 10 µg/ml  | 876607  | 1429500.4            | 955745  | 724830               | 0.917197579        | 2.073244697                          | 0.678583397                         |
| 2                         |           | 1605261 |                      | 688744  |                      | 2.330707781        |                                      |                                     |
| 3                         |           | 1649151 |                      | 654173  |                      | 2.520970752        |                                      |                                     |
| 4                         |           | 1468108 |                      | 720764  |                      | 2.036877536        |                                      |                                     |
| 5                         |           | 1548375 |                      | 604723  |                      | 2.560469835        |                                      |                                     |
| 1                         | 20 µg/ml  | 2716210 | 2726256.6            | 521979  | 516120               | 5.203676776        | 5.28276988                           | 0.068559113                         |
| 2                         |           | 2749185 |                      | 515384  |                      | 5.334245921        |                                      |                                     |
| 3                         |           | 2745403 |                      | 511908  |                      | 5.363078913        |                                      |                                     |
| 4                         |           | 2675771 |                      | 505960  |                      | 5.288503044        |                                      |                                     |
| 5                         |           | 2744714 |                      | 525370  |                      | 5.224344748        |                                      |                                     |
| 1                         | 50 µg/ml  | 5616577 | 5588423.6            | 324213  | 331428               | 17.32372545        | 16.92546552                          | 1.080295373                         |
| 2                         |           | 5730654 |                      | 312552  |                      | 18.33504185        |                                      |                                     |
| 3                         |           | 5804163 |                      | 375270  |                      | 15.46663202        |                                      |                                     |
| 4                         |           | 5580308 |                      | 341458  |                      | 16.34258972        |                                      |                                     |
| 5                         |           | 5210416 |                      | 303649  |                      | 17.15933858        |                                      |                                     |
| 1                         | 100 µg/ml | 6899815 | 6996595.2            | 196576  | 191035               | 35.09998677        | 37.03400166                          | 4.359006821                         |
| 2                         |           | 6961989 |                      | 209434  |                      | 33.24192347        |                                      |                                     |
| 3                         |           | 7167270 |                      | 179563  |                      | 39.91507159        |                                      |                                     |
| 4                         |           | 7141847 |                      | 212019  |                      | 33.68493861        |                                      |                                     |
| 5                         |           | 6812055 |                      | 157584  |                      | 43.22808788        |                                      |                                     |

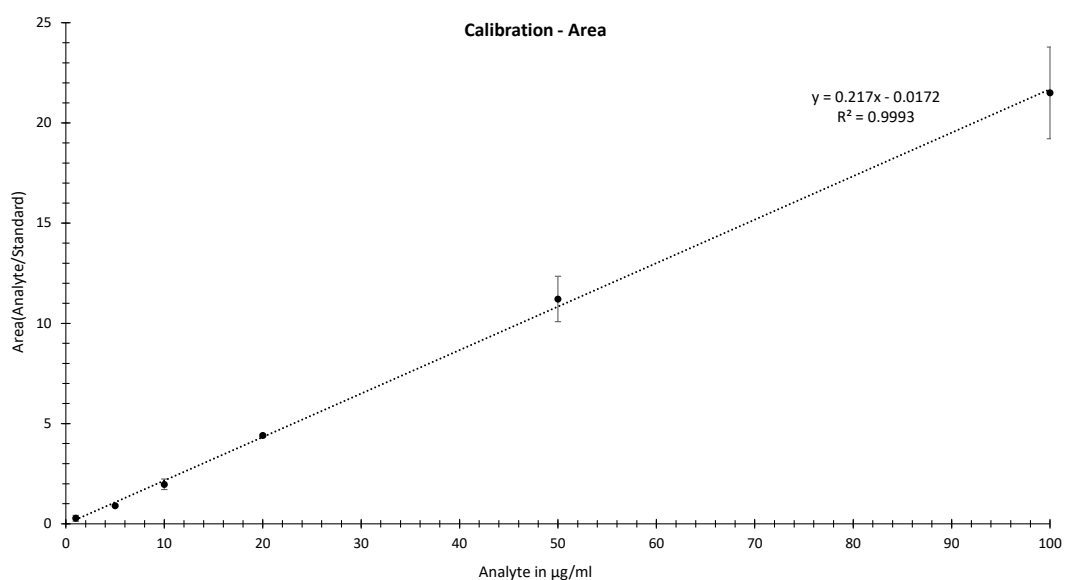

Figure S4: Calibration curve of isobaric pair 2 via MRM TIC area.

Table S3: Raw data for creation of calibration curve in Figure S2 via MRM TIC area (An = analyte; IS = internal standard).

| Calibration I - Area |           |         |                      |        |                      |                    |                               |                              |
|----------------------|-----------|---------|----------------------|--------|----------------------|--------------------|-------------------------------|------------------------------|
| Measurement          | c(An)     | A(An)   | $\bar{X}(\text{An})$ | A(IS)  | $\bar{X}(\text{IS})$ | ratio[A(An)/A(IS)] | $\bar{X}[\text{A(An)/A(IS)}]$ | $\sigma[\text{A(An)/A(IS)}]$ |
| 1                    | 1 µg/ml   | 109182  | 104207.6             | 205609 | 446840               | 0.531017611        | 0.272369817                   | 0.147154383                  |
| 2                    |           | 106338  |                      | 648002 |                      | 0.164101345        |                               |                              |
| 3                    |           | 105162  |                      | 507913 |                      | 0.20704727         |                               |                              |
| 4                    |           | 100292  |                      | 451075 |                      | 0.222339966        |                               |                              |
| 5                    |           | 100064  |                      | 421601 |                      | 0.237342891        |                               |                              |
| 1                    | 5 µg/ml   | 401332  | 411919.2             | 497189 | 456910               | 0.80720209         | 0.903747505                   | 0.055320398                  |
| 2                    |           | 410811  |                      | 452577 |                      | 0.907715151        |                               |                              |
| 3                    |           | 419650  |                      | 450533 |                      | 0.931452302        |                               |                              |
| 4                    |           | 414047  |                      | 444193 |                      | 0.932133104        |                               |                              |
| 5                    |           | 413756  |                      | 440056 |                      | 0.940234879        |                               |                              |
| 1                    | 10 µg/ml  | 759033  | 772196.6             | 502451 | 399379               | 1.510660741        | 1.964864987                   | 0.26400505                   |
| 2                    |           | 776828  |                      | 397018 |                      | 1.956656877        |                               |                              |
| 3                    |           | 784070  |                      | 374830 |                      | 2.091801617        |                               |                              |
| 4                    |           | 783000  |                      | 366380 |                      | 2.137125389        |                               |                              |
| 5                    |           | 758052  |                      | 356214 |                      | 2.128080311        |                               |                              |
| 1                    | 20 µg/ml  | 1314852 | 1320227              | 296480 | 300086               | 4.434875877        | 4.400322135                   | 0.059931782                  |
| 2                    |           | 1323744 |                      | 296061 |                      | 4.471186681        |                               |                              |
| 3                    |           | 1314994 |                      | 298234 |                      | 4.409269232        |                               |                              |
| 4                    |           | 1311572 |                      | 300075 |                      | 4.370813963        |                               |                              |
| 5                    |           | 1335973 |                      | 309578 |                      | 4.315464923        |                               |                              |
| 1                    | 50 µg/ml  | 2598585 | 2640745.2            | 234620 | 237599               | 11.07571818        | 11.21233832                   | 1.134267506                  |
| 2                    |           | 2656863 |                      | 251891 |                      | 10.54766943        |                               |                              |
| 3                    |           | 2678581 |                      | 273823 |                      | 9.7821622          |                               |                              |
| 4                    |           | 2633155 |                      | 218454 |                      | 12.05359023        |                               |                              |
| 5                    |           | 2636542 |                      | 209207 |                      | 12.60255154        |                               |                              |
| 1                    | 100 µg/ml | 2858083 | 3052872.4            | 144820 | 142145               | 19.73541638        | 21.63515943                   | 2.285727571                  |
| 2                    |           | 3054761 |                      | 164088 |                      | 18.61660207        |                               |                              |
| 3                    |           | 3120077 |                      | 135443 |                      | 23.03608898        |                               |                              |
| 4                    |           | 3122559 |                      | 132795 |                      | 23.5141308         |                               |                              |
| 5                    |           | 3108882 |                      | 133580 |                      | 23.27355892        |                               |                              |

### 3. Method Qualification – Linearity

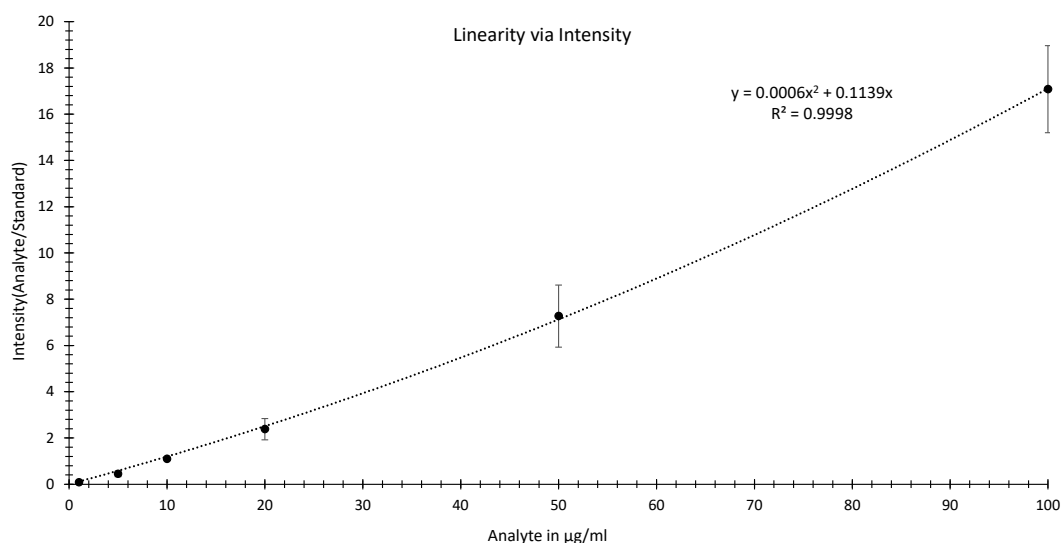

Figure S5: Calibration curve of isobaric pair 1 via intensity.

Table S4: Raw data for creation of calibration curve in Figure S3 signal intensity (An = analyte; IS = internal standard).

| Calibration - Intensity |           |        |                      |         |                      |                    |                                      |                                     |
|-------------------------|-----------|--------|----------------------|---------|----------------------|--------------------|--------------------------------------|-------------------------------------|
| Measurement             | c(An/IS)  | I(An)  | $\bar{X}(\text{An})$ | I(IS)   | $\bar{X}(\text{IS})$ | ratio[I(An)/I(IS)] | $\bar{X}[I(\text{An})/I(\text{IS})]$ | $\sigma[I(\text{An})/I(\text{IS})]$ |
| 1                       | 1 µg/ml   | 359632 | 310617.4             | 17266   | 24091                | 0.048010188        | 0.078623605                          | 0.019480198                         |
| 2                       |           | 293342 |                      | 20974   |                      | 0.07150016         |                                      |                                     |
| 3                       |           | 266859 |                      | 22771   |                      | 0.085329706        |                                      |                                     |
| 4                       |           | 252227 |                      | 24081   |                      | 0.095473522        |                                      |                                     |
| 5                       |           | 381027 |                      | 35361   |                      | 0.092804447        |                                      |                                     |
| 1                       | 5 µg/ml   | 351922 | 342928.2             | 88149   | 154251               | 0.250478799        | 0.448405117                          | 0.12350485                          |
| 2                       |           | 305989 |                      | 124616  |                      | 0.40725647         |                                      |                                     |
| 3                       |           | 317342 |                      | 169966  |                      | 0.535592515        |                                      |                                     |
| 4                       |           | 388051 |                      | 212191  |                      | 0.546812146        |                                      |                                     |
| 5                       |           | 351337 |                      | 176331  |                      | 0.501885654        |                                      |                                     |
| 1                       | 10 µg/ml  | 524686 | 573733               | 550636  | 628575               | 1.049458152        | 1.096042124                          | 0.04944966                          |
| 2                       |           | 542737 |                      | 612089  |                      | 1.127781964        |                                      |                                     |
| 3                       |           | 581392 |                      | 660633  |                      | 1.136295305        |                                      |                                     |
| 4                       |           | 589309 |                      | 666868  |                      | 1.131610072        |                                      |                                     |
| 5                       |           | 630541 |                      | 652651  |                      | 1.035065127        |                                      |                                     |
| 1                       | 20 µg/ml  | 614719 | 499098               | 1006443 | 1164925              | 1.637240756        | 2.381091934                          | 0.462632854                         |
| 2                       |           | 488201 |                      | 1087562 |                      | 2.227693102        |                                      |                                     |
| 3                       |           | 485666 |                      | 1274230 |                      | 2.62367553         |                                      |                                     |
| 4                       |           | 454413 |                      | 1255901 |                      | 2.763787568        |                                      |                                     |
| 5                       |           | 452491 |                      | 1200487 |                      | 2.653062713        |                                      |                                     |
| 1                       | 50 µg/ml  | 369988 | 300981.6             | 1966505 | 2141802              | 5.315050758        | 7.26751094                           | 1.341390023                         |
| 2                       |           | 313725 |                      | 2070741 |                      | 6.600497251        |                                      |                                     |
| 3                       |           | 287541 |                      | 2163250 |                      | 7.523274942        |                                      |                                     |
| 4                       |           | 265523 |                      | 2297043 |                      | 8.651013283        |                                      |                                     |
| 5                       |           | 268131 |                      | 2211469 |                      | 8.247718466        |                                      |                                     |
| 1                       | 100 µg/ml | 180932 | 162403               | 2621674 | 2757273              | 14.48983043        | 17.08066615                          | 1.884692985                         |
| 2                       |           | 167111 |                      | 2651840 |                      | 15.86873396        |                                      |                                     |
| 3                       |           | 155860 |                      | 2744157 |                      | 17.60655075        |                                      |                                     |
| 4                       |           | 155327 |                      | 2975424 |                      | 19.15587116        |                                      |                                     |
| 5                       |           | 152785 |                      | 2793268 |                      | 18.28234447        |                                      |                                     |



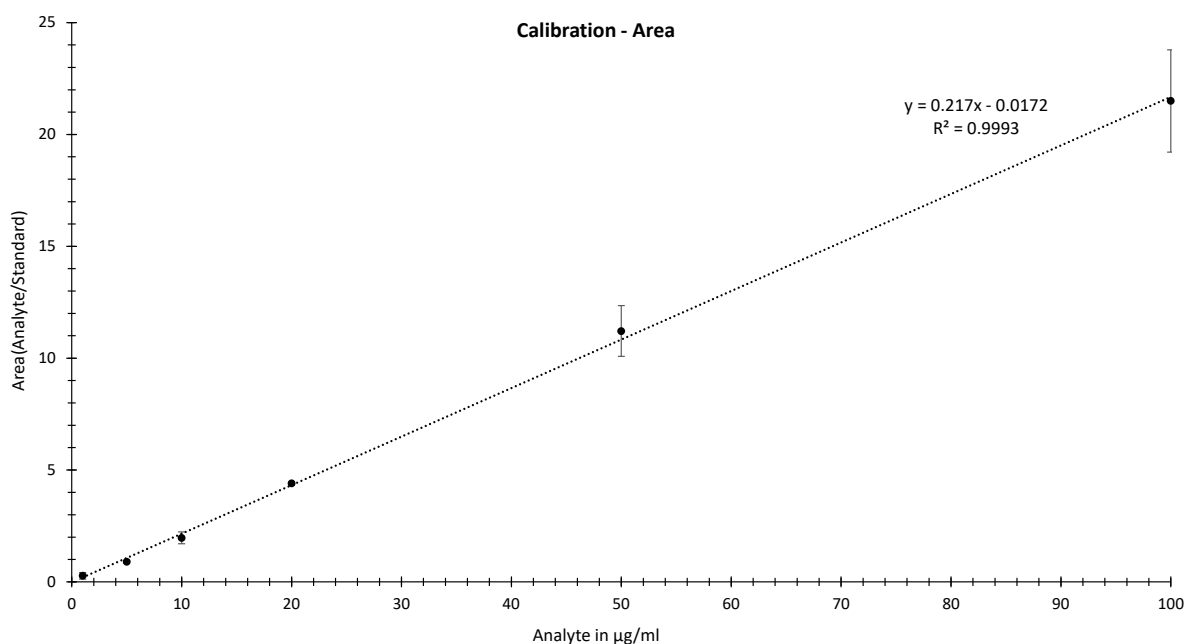

Figure S6: Calibration curve of isobaric pair 1 via MRM TIC area. (see Figure 4)

Table S5: Raw data for creation of calibration curve in Figure S4 via MRM TIC area (An = analyte; IS = internal standard).

| Calibration I - Area |           |         |                      |        |                      |                    |                                      |                                     |
|----------------------|-----------|---------|----------------------|--------|----------------------|--------------------|--------------------------------------|-------------------------------------|
| Measurement          | c(An)     | A(An)   | $\bar{X}(\text{An})$ | A(IS)  | $\bar{X}(\text{IS})$ | ratio[A(An)/A(IS)] | $\bar{X}[A(\text{An})/A(\text{IS})]$ | $\sigma[A(\text{An})/A(\text{IS})]$ |
| 1                    | 1 µg/ml   | 109182  | 104207.6             | 205609 | 446840               | 0.531017611        | 0.272369817                          | 0.147154383                         |
| 2                    |           | 106338  |                      | 648002 |                      | 0.164101345        |                                      |                                     |
| 3                    |           | 105162  |                      | 507913 |                      | 0.20704727         |                                      |                                     |
| 4                    |           | 100292  |                      | 451075 |                      | 0.222339966        |                                      |                                     |
| 5                    |           | 100064  |                      | 421601 |                      | 0.237342891        |                                      |                                     |
| 1                    | 5 µg/ml   | 401332  | 411919.2             | 497189 | 456910               | 0.80720209         | 0.903747505                          | 0.055320398                         |
| 2                    |           | 410811  |                      | 452577 |                      | 0.907715151        |                                      |                                     |
| 3                    |           | 419650  |                      | 450533 |                      | 0.931452302        |                                      |                                     |
| 4                    |           | 414047  |                      | 444193 |                      | 0.932133104        |                                      |                                     |
| 5                    |           | 413756  |                      | 440056 |                      | 0.940234879        |                                      |                                     |
| 1                    | 10 µg/ml  | 759033  | 772196.6             | 502451 | 399379               | 1.510660741        | 1.964864987                          | 0.26400505                          |
| 2                    |           | 776828  |                      | 397018 |                      | 1.956656877        |                                      |                                     |
| 3                    |           | 784070  |                      | 374830 |                      | 2.091801617        |                                      |                                     |
| 4                    |           | 783000  |                      | 366380 |                      | 2.137125389        |                                      |                                     |
| 5                    |           | 758052  |                      | 356214 |                      | 2.128080311        |                                      |                                     |
| 1                    | 20 µg/ml  | 1314852 | 1320227              | 296480 | 300086               | 4.434875877        | 4.400322135                          | 0.059931782                         |
| 2                    |           | 1323744 |                      | 296061 |                      | 4.471186681        |                                      |                                     |
| 3                    |           | 1314994 |                      | 298234 |                      | 4.409269232        |                                      |                                     |
| 4                    |           | 1311572 |                      | 300075 |                      | 4.370813963        |                                      |                                     |
| 5                    |           | 1335973 |                      | 309578 |                      | 4.315464923        |                                      |                                     |
| 1                    | 50 µg/ml  | 2598585 | 2640745.2            | 234620 | 237599               | 11.07571818        | 11.21233832                          | 1.134267506                         |
| 2                    |           | 2656863 |                      | 251891 |                      | 10.54766943        |                                      |                                     |
| 3                    |           | 2678581 |                      | 273823 |                      | 9.7821622          |                                      |                                     |
| 4                    |           | 2633155 |                      | 218454 |                      | 12.05359023        |                                      |                                     |
| 5                    |           | 2636542 |                      | 209207 |                      | 12.60255154        |                                      |                                     |
| 1                    | 100 µg/ml | 2858083 | 3052872.4            | 144820 | 142145               | 19.73541638        | 21.63515943                          | 2.285727571                         |
| 2                    |           | 3054761 |                      | 164088 |                      | 18.61660207        |                                      |                                     |
| 3                    |           | 3120077 |                      | 135443 |                      | 23.03608898        |                                      |                                     |
| 4                    |           | 3122559 |                      | 132795 |                      | 23.5141308         |                                      |                                     |
| 5                    |           | 3108882 |                      | 133580 |                      | 23.27355892        |                                      |                                     |

## 4. Method Qualification – Sensitivity

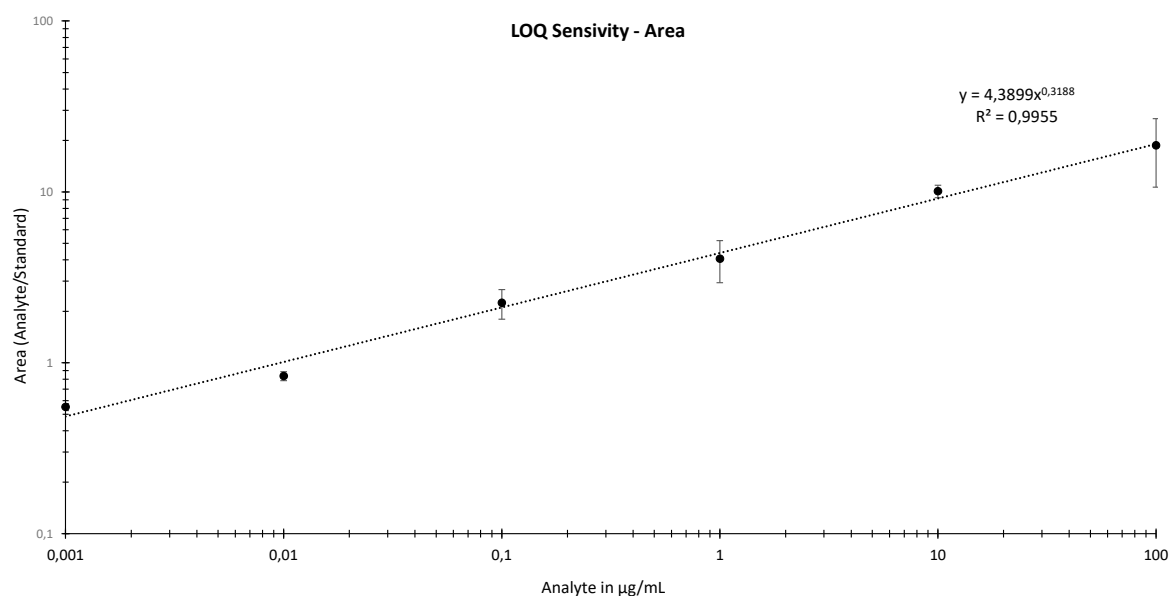

Figure S7: Sensitivity experiments of isobaric pair 1 analyte via MRM TIC area on a logarithmic scale. With LLOQ of 1 ng/ml.

Table S6: Raw data for sensitivity experiment in Figure S5 via MRM TIC area (An = analyte; IS = internal standard).

| LOQ Sensitivity - Area |           |        |                      |       |                      |                    |                                      |                                     |
|------------------------|-----------|--------|----------------------|-------|----------------------|--------------------|--------------------------------------|-------------------------------------|
| Measurement            | c(An/IS)  | A(An)  | $\bar{X}(\text{An})$ | A(IS) | $\bar{X}(\text{An})$ | ratio[A(An)/A(IS)] | $\bar{X}[A(\text{An})/A(\text{IS})]$ | $\sigma[A(\text{An})/A(\text{IS})]$ |
| 1                      | 1 ng/ml   | 28072  | 29049,33333          | 48313 | 52809                | 0,581044439        | 0,551340966                          | 0,025724094                         |
| 2                      |           | 26189  |                      | 48823 |                      | 0,536407021        |                                      |                                     |
| 3                      |           | 32887  |                      | 61291 |                      | 0,536571438        |                                      |                                     |
| 1                      | 10 ng/ml  | 50271  | 50036                | 63633 | 60001                | 0,790014615        | 0,83603941                           | 0,049650276                         |
| 2                      |           | 50121  |                      | 60427 |                      | 0,829447101        |                                      |                                     |
| 3                      |           | 49715  |                      | 55944 |                      | 0,888656514        |                                      |                                     |
| 1                      | 100 ng/ml | 89992  | 91978                | 49595 | 41990                | 1,814537756        | 2,239763215                          | 0,43905356                          |
| 2                      |           | 90803  |                      | 41026 |                      | 2,213303759        |                                      |                                     |
| 3                      |           | 95140  |                      | 35349 |                      | 2,691448131        |                                      |                                     |
| 1                      | 1 µg/ml   | 167267 | 170100               | 48518 | 43635                | 3,44752463         | 4,060907553                          | 1,121691319                         |
| 2                      |           | 167966 |                      | 49699 |                      | 3,379665587        |                                      |                                     |
| 3                      |           | 175067 |                      | 32689 |                      | 5,355532442        |                                      |                                     |
| 1                      | 10 µg/ml  | 288514 | 292386               | 31548 | 29127                | 9,145239001        | 10,08156874                          | 0,852228267                         |
| 2                      |           | 294439 |                      | 28621 |                      | 10,28751616        |                                      |                                     |
| 3                      |           | 294204 |                      | 27211 |                      | 10,81195105        |                                      |                                     |
| 1                      | 100 µg/ml | 411756 | 434461               | 44109 | 26778                | 10,01620083        | 18,72715829                          | 8,063122706                         |
| 2                      |           | 445799 |                      | 22030 |                      | 20,23599637        |                                      |                                     |
| 3                      |           | 445828 |                      | 17194 |                      | 25,92927765        |                                      |                                     |

Table S7: Raw data for precision determination of LLOQ in Figure S5 via MRM TIC area (An = analyte; IS = internal standard).

| LLOQ Precision - Area |          |       |                      |       |                      |                    |                                      |                                     |
|-----------------------|----------|-------|----------------------|-------|----------------------|--------------------|--------------------------------------|-------------------------------------|
| Measurement           | c(An/IS) | A(An) | $\bar{X}(\text{An})$ | A(IS) | $\bar{X}(\text{An})$ | ratio[A(An)/A(IS)] | $\bar{X}[A(\text{An})/A(\text{IS})]$ | $\sigma[A(\text{An})/A(\text{IS})]$ |
| 1                     | 1 ng/ml  | 28072 | 29049,33333          | 48313 | 52809                | 0,581044439        | 0,551340966                          | 0,025724094                         |
| 2                     |          | 26189 |                      | 48823 |                      | 0,536407021        |                                      |                                     |
| 3                     |          | 32887 |                      | 61291 |                      | 0,536571438        |                                      |                                     |
| 1                     | 1 ng/ml  | 27635 | 26462                | 44525 | 49382                | 0,620662549        | 0,538372581                          | 0,094227745                         |
| 2                     |          | 21763 |                      | 49963 |                      | 0,435582331        |                                      |                                     |
| 3                     |          | 29988 |                      | 53658 |                      | 0,558872861        |                                      |                                     |
| 1                     | 1 ng/ml  | 25812 | 28367,33333          | 48655 | 55255                | 0,530510739        | 0,511053017                          | 0,043107607                         |
| 2                     |          | 23658 |                      | 51247 |                      | 0,461646535        |                                      |                                     |
| 3                     |          | 35632 |                      | 65863 |                      | 0,541001776        |                                      |                                     |

## 5. Method Qualification – Accuracy & Precision

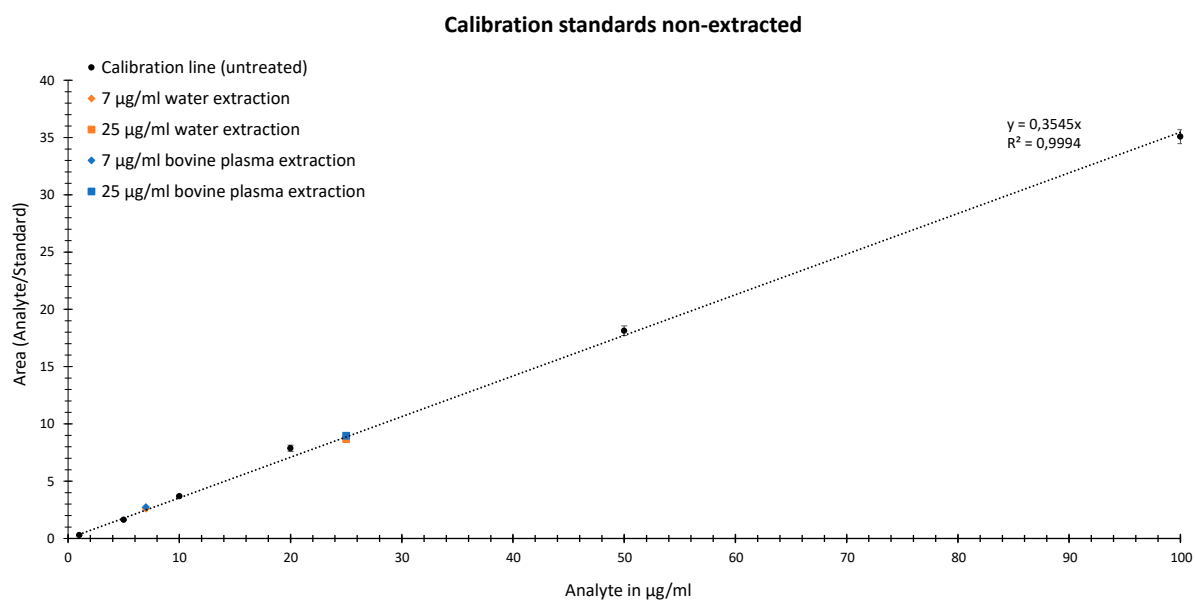

Figure S8: Calibration curve of isobaric pair 1 via MRM TIC area; non-extracted. (see Figure 5)

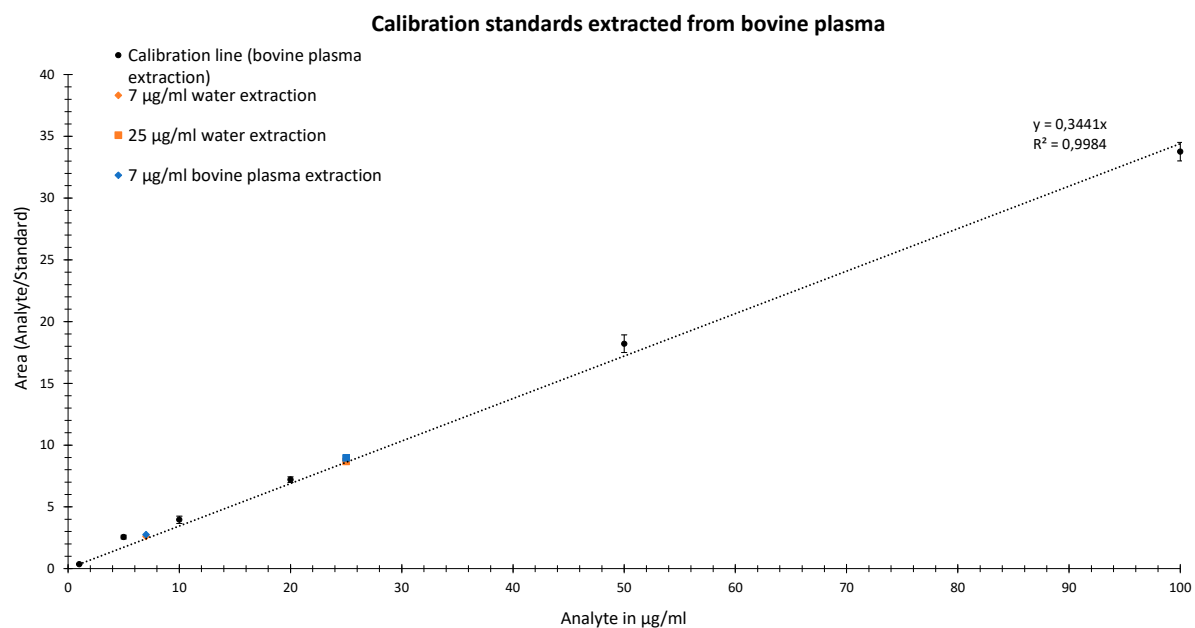

Figure S9: Calibration curve of isobaric pair 1 via MRM TIC area; extracted from bovine plasma. (see Figure 5)

Table S8: Raw data for non-extracted calibration curve in Figure S6 via MRM TIC area (An = analyte; IS = internal standard).

| Calibration curve non-extracted - Area |           |        |                      |       |                      |                    |                                      |                                     |
|----------------------------------------|-----------|--------|----------------------|-------|----------------------|--------------------|--------------------------------------|-------------------------------------|
| Measurement                            | c(An)     | A(An)  | $\bar{X}(\text{An})$ | A(IS) | $\bar{X}(\text{IS})$ | ratio[A(An)/A(IS)] | $\bar{X}[A(\text{An})/A(\text{IS})]$ | $\sigma[A(\text{An})/A(\text{IS})]$ |
| 1                                      | 1 µg/ml   | 1765   | 1710                 | 5938  | 5785                 | 0,297238127        | 0,295571172                          | 0,001976986                         |
| 2                                      |           | 1677   |                      | 5716  |                      | 0,293386984        |                                      |                                     |
| 3                                      |           | 1688   |                      | 5701  |                      | 0,296088406        |                                      |                                     |
| 1                                      | 5 µg/ml   | 7342   | 7534                 | 4433  | 4602                 | 1,656214753        | 1,637940416                          | 0,039646869                         |
| 2                                      |           | 7708   |                      | 4629  |                      | 1,665154461        |                                      |                                     |
| 3                                      |           | 7553   |                      | 4743  |                      | 1,592452035        |                                      |                                     |
| 1                                      | 10 µg/ml  | 14368  | 14222                | 3805  | 3854                 | 3,7760841          | 3,691193796                          | 0,075353749                         |
| 2                                      |           | 14162  |                      | 3899  |                      | 3,632213388        |                                      |                                     |
| 3                                      |           | 14137  |                      | 3857  |                      | 3,665283899        |                                      |                                     |
| 1                                      | 20 µg/ml  | 31917  | 32176                | 4162  | 4088                 | 7,668668909        | 7,874877387                          | 0,27422088                          |
| 2                                      |           | 32466  |                      | 3966  |                      | 8,186081694        |                                      |                                     |
| 3                                      |           | 32144  |                      | 4137  |                      | 7,769881557        |                                      |                                     |
| 1                                      | 50 µg/ml  | 77254  | 74989                | 4344  | 4139,666667          | 17,78406998        | 18,12967702                          | 0,416599958                         |
| 2                                      |           | 72547  |                      | 3902  |                      | 18,59226038        |                                      |                                     |
| 3                                      |           | 75167  |                      | 4173  |                      | 18,01270069        |                                      |                                     |
| 1                                      | 100 µg/ml | 139568 | 140361               | 3934  | 4002                 | 35,47737672        | 35,08062098                          | 0,610312064                         |
| 2                                      |           | 140571 |                      | 4089  |                      | 34,37784299        |                                      |                                     |
| 3                                      |           | 140945 |                      | 3983  |                      | 35,38664323        |                                      |                                     |

Table S9: Raw data for calibration curve extracted from bovine plasma in Figure S7 via MRM TIC area (An = analyte; IS = internal standard).

| Calibration curve extracted from bovine plasma - Area |           |       |                      |       |                      |                    |                                      |                                     |
|-------------------------------------------------------|-----------|-------|----------------------|-------|----------------------|--------------------|--------------------------------------|-------------------------------------|
| Measurement                                           | c(An)     | A(An) | $\bar{X}(\text{An})$ | A(IS) | $\bar{X}(\text{IS})$ | ratio[A(An)/A(IS)] | $\bar{X}[A(\text{An})/A(\text{IS})]$ | $\sigma[A(\text{An})/A(\text{IS})]$ |
| 1                                                     | 1 µg/ml   | 195   | 195,33               | 581   | 560,666667           | 0,335628227        | 0,350309416                          | 0,033015161                         |
| 2                                                     |           | 195   |                      | 596   |                      | 0,327181208        |                                      |                                     |
| 3                                                     |           | 196   |                      | 505   |                      | 0,388118812        |                                      |                                     |
| 1                                                     | 5 µg/ml   | 1577  | 1502,00              | 584   | 590                  | 2,700342466        | 2,549946978                          | 0,151609526                         |
| 2                                                     |           | 1414  |                      | 554   |                      | 2,55234657         |                                      |                                     |
| 3                                                     |           | 1515  |                      | 632   |                      | 2,397151899        |                                      |                                     |
| 1                                                     | 10 µg/ml  | 1883  | 1935,33              | 520   | 489,666667           | 3,621153846        | 3,962623424                          | 0,29686754                          |
| 2                                                     |           | 1914  |                      | 466   |                      | 4,107296137        |                                      |                                     |
| 3                                                     |           | 2009  |                      | 483   |                      | 4,15942029         |                                      |                                     |
| 1                                                     | 20 µg/ml  | 5385  | 5322,67              | 729   | 739,666667           | 7,386831276        | 7,198537238                          | 0,227641912                         |
| 2                                                     |           | 5353  |                      | 737   |                      | 7,263229308        |                                      |                                     |
| 3                                                     |           | 5230  |                      | 753   |                      | 6,945551129        |                                      |                                     |
| 1                                                     | 50 µg/ml  | 14583 | 14766,67             | 788   | 811,666667           | 18,50634518        | 18,20102772                          | 0,716978415                         |
| 2                                                     |           | 15290 |                      | 817   |                      | 18,71481028        |                                      |                                     |
| 3                                                     |           | 14427 |                      | 830   |                      | 17,38192771        |                                      |                                     |
| 1                                                     | 100 µg/ml | 57220 | 57570,00             | 1667  | 1706,333333          | 34,32513497        | 33,75545995                          | 0,747896612                         |
| 2                                                     |           | 57209 |                      | 1681  |                      | 34,03271862        |                                      |                                     |
| 3                                                     |           | 58281 |                      | 1771  |                      | 32,90852626        |                                      |                                     |

Table S10: Raw data for sample testing extracted from water in Figure S6 & S7 via MRM TIC area (An = analyte; IS = internal standard).

| Extraction from water - 7 µg/ml - Area  |          |       |                      |       |                      |                    |                                      |                                     |
|-----------------------------------------|----------|-------|----------------------|-------|----------------------|--------------------|--------------------------------------|-------------------------------------|
| Measurement                             | c(An)    | A(An) | $\bar{X}(\text{An})$ | A(IS) | $\bar{X}(\text{IS})$ | ratio[A(An)/A(IS)] | $\bar{X}[A(\text{An})/A(\text{IS})]$ | $\sigma[A(\text{An})/A(\text{IS})]$ |
| 1                                       | 7 µg/mL  | 6023  | 5305,333333          | 2028  | 2040                 | 2,969921105        | 2,605322318                          | 0,340716699                         |
| 2                                       |          | 5023  |                      | 1969  |                      | 2,551041138        |                                      |                                     |
| 3                                       |          | 4870  |                      | 2122  |                      | 2,295004713        |                                      |                                     |
| Extraction from water - 25 µg/ml - Area |          |       |                      |       |                      |                    |                                      |                                     |
| Measurement                             | c(An)    | A(An) | $\bar{X}(\text{An})$ | A(IS) | $\bar{X}(\text{IS})$ | ratio[A(An)/A(IS)] | $\bar{X}[A(\text{An})/A(\text{IS})]$ | $\sigma[A(\text{An})/A(\text{IS})]$ |
| 1                                       | 25 µg/mL | 18127 | 17660,66667          | 1981  | 2040                 | 9,150429076        | 8,671379084                          | 0,549367478                         |
| 2                                       |          | 17751 |                      | 2019  |                      | 8,791976226        |                                      |                                     |
| 3                                       |          | 17104 |                      | 2119  |                      | 8,071731949        |                                      |                                     |

Table S11: Raw data for sample testing extracted from bovine plasma in Figure S6 & S7 via MRM TIC area (An = analyte; IS = internal standard).

| Extraction from bovine plasma - 7 µg/ml - Area  |          |       |                      |       |                      |                    |                                      |                                     |
|-------------------------------------------------|----------|-------|----------------------|-------|----------------------|--------------------|--------------------------------------|-------------------------------------|
| Messung                                         | c(An)    | A(An) | $\bar{X}(\text{An})$ | A(IS) | $\bar{X}(\text{IS})$ | ratio[A(An)/A(IS)] | $\bar{X}[A(\text{An})/A(\text{IS})]$ | $\sigma[A(\text{An})/A(\text{IS})]$ |
| 1                                               | 7 µg/mL  | 6862  | 7816,66667           | 3267  | 2923                 | 2,100397919        | 2,739246718                          | 0,787221661                         |
| 2                                               |          | 7411  |                      | 2966  |                      | 2,498651382        |                                      |                                     |
| 3                                               |          | 9177  |                      | 2536  |                      | 3,618690852        |                                      |                                     |
| Extraction from bovine plasma - 25 µg/ml - Area |          |       |                      |       |                      |                    |                                      |                                     |
| Messung                                         | c(An)    | A(An) | $\bar{X}(\text{An})$ | A(IS) | $\bar{X}(\text{IS})$ | ratio[A(An)/A(IS)] | $\bar{X}[A(\text{An})/A(\text{IS})]$ | $\sigma[A(\text{An})/A(\text{IS})]$ |
| 1                                               | 25 µg/mL | 37301 | 36942,33333          | 4330  | 4131                 | 8,614549654        | 8,963087554                          | 0,504476649                         |
| 2                                               |          | 36915 |                      | 4227  |                      | 8,733144074        |                                      |                                     |
| 3                                               |          | 36611 |                      | 3837  |                      | 9,541568934        |                                      |                                     |

Table S12: Raw data for precision calculation by triplicate replica from analyte sample testing

| Precision                    |          |                                     |          |
|------------------------------|----------|-------------------------------------|----------|
| Calibration line (untreated) |          | Calibration line (Plasma extracted) |          |
| 7 µg/ml                      | 25 µg/ml | 7 µg/ml                             | 25 µg/ml |
| 2,605                        | 8,6713   | 2,739                               | 8,963    |
| 2,545                        | 8,81     | 2,699                               | 8,866    |
| 2,666                        | 8,556    | 2,743                               | 8,799    |

## 6. Method Qualification – Short term biofluid stability study

Table S13: Raw data for biofluid stability study in bovine plasma via MRM TIC area; set 1 (An = analyte; IS = internal standard).

| Pharmacokinetic - Area - Bio. Rep. Set 1 |       |        |                      |       |                      |                    |                               |                              |
|------------------------------------------|-------|--------|----------------------|-------|----------------------|--------------------|-------------------------------|------------------------------|
| Measurement                              | t [h] | A(An)  | $\bar{X}(\text{An})$ | A(IS) | $\bar{X}(\text{IS})$ | ratio[A(An)/A(IS)] | $\bar{X}[\text{A(An)/A(IS)}]$ | $\sigma[\text{A(An)/A(IS)}]$ |
| 1                                        | 0     | 60270  | 56617                | 11587 | 10827                | 5,201518944        | 5,231400977                   | 0,088918939                  |
| 2                                        |       | 55014  |                      | 10659 |                      | 5,161272164        |                               |                              |
| 3                                        |       | 54567  |                      | 10235 |                      | 5,331411822        |                               |                              |
| 1                                        | 0,25  | 51050  | 45951                | 11885 | 10455                | 4,295330248        | 4,42082198                    | 0,198768062                  |
| 2                                        |       | 37744  |                      | 8117  |                      | 4,64999384         |                               |                              |
| 3                                        |       | 49060  |                      | 11364 |                      | 4,317141851        |                               |                              |
| 1                                        | 1     | 38159  | 38350                | 11069 | 11423                | 3,447375553        | 3,358669688                   | 0,0768264                    |
| 2                                        |       | 38721  |                      | 11686 |                      | 3,313451994        |                               |                              |
| 3                                        |       | 38171  |                      | 11514 |                      | 3,315181518        |                               |                              |
| 1                                        | 4     | 21106  | 20115                | 7798  | 7696                 | 2,706591434        | 2,613243927                   | 0,081121063                  |
| 2                                        |       | 18255  |                      | 7094  |                      | 2,573301381        |                               |                              |
| 3                                        |       | 20983  |                      | 8197  |                      | 2,559838965        |                               |                              |
| 1                                        | 24    | 37662  | 38253                | 13603 | 13844,6667           | 2,768653973        | 2,766873384                   | 0,121972585                  |
| 2                                        |       | 38645  |                      | 14616 |                      | 2,644020252        |                               |                              |
| 3                                        |       | 38453  |                      | 13315 |                      | 2,887945926        |                               |                              |
| 1                                        | 48    | 169835 | 171369               | 64859 | 64827                | 2,618526342        | 2,643554487                   | 0,025044231                  |
| 2                                        |       | 172585 |                      | 65286 |                      | 2,643522348        |                               |                              |
| 3                                        |       | 171688 |                      | 64336 |                      | 2,668614772        |                               |                              |
| 1                                        | 96    | 40551  | 38918                | 18947 | 18561                | 2,140233282        | 2,096198211                   | 0,039091893                  |
| 2                                        |       | 38850  |                      | 18653 |                      | 2,082774889        |                               |                              |
| 3                                        |       | 37352  |                      | 18083 |                      | 2,065586462        |                               |                              |
| 1                                        | 192   | 21556  | 21534                | 14397 | 14872                | 1,497256373        | 1,4487994                     | 0,043273595                  |
| 2                                        |       | 21640  |                      | 15304 |                      | 1,414009409        |                               |                              |
| 3                                        |       | 21405  |                      | 14915 |                      | 1,435132417        |                               |                              |

Table S14: Raw data for biofluid stability study in bovine plasma via MRM TIC area; set 2 (An = analyte; IS = internal standard).

| Pharmacokinetic - Area - Bio. Rep. Set 2 |       |        |                      |       |                      |                    |                                      |                                     |
|------------------------------------------|-------|--------|----------------------|-------|----------------------|--------------------|--------------------------------------|-------------------------------------|
| Measurement                              | t [h] | A(An)  | $\bar{X}(\text{An})$ | A(IS) | $\bar{X}(\text{IS})$ | ratio[A(An)/A(IS)] | $\bar{X}[A(\text{An})/A(\text{IS})]$ | $\sigma[A(\text{An})/A(\text{IS})]$ |
| 1                                        | 0     | 53673  | 54197,33333          | 9979  | 10090                | 5,37859505         | 5,373984655                          | 0,074223665                         |
| 2                                        |       | 52394  |                      | 9621  |                      | 5,445795655        |                                      |                                     |
| 3                                        |       | 56525  |                      | 10670 |                      | 5,297563261        |                                      |                                     |
| 1                                        | 0,25  | 56826  | 54119                | 11975 | 11534                | 4,745386221        | 4,698791524                          | 0,169850825                         |
| 2                                        |       | 54523  |                      | 12088 |                      | 4,510506287        |                                      |                                     |
| 3                                        |       | 51009  |                      | 10538 |                      | 4,840482065        |                                      |                                     |
| 1                                        | 1     | 29997  | 29201                | 9061  | 8893                 | 3,310561748        | 3,283684472                          | 0,047736916                         |
| 2                                        |       | 28886  |                      | 8947  |                      | 3,228568235        |                                      |                                     |
| 3                                        |       | 28721  |                      | 8672  |                      | 3,311923432        |                                      |                                     |
| 1                                        | 4     | 30447  | 29805                | 10182 | 10430                | 2,990276959        | 2,859183991                          | 0,113530149                         |
| 2                                        |       | 28956  |                      | 10364 |                      | 2,793901968        |                                      |                                     |
| 3                                        |       | 30012  |                      | 10744 |                      | 2,793373045        |                                      |                                     |
| 1                                        | 24    | 168859 | 170655               | 51230 | 53122                | 3,296096037        | 3,214252202                          | 0,077841471                         |
| 2                                        |       | 171062 |                      | 53365 |                      | 3,205509229        |                                      |                                     |
| 3                                        |       | 172044 |                      | 54771 |                      | 3,141151339        |                                      |                                     |
| 1                                        | 48    | 185730 | 107349               | 69861 | 49781,6667           | 2,658564865        | 2,248335727                          | 0,682150012                         |
| 2                                        |       | 45535  |                      | 17343 |                      | 2,625554979        |                                      |                                     |
| 3                                        |       | 90781  |                      | 62141 |                      | 1,460887337        |                                      |                                     |
| 1                                        | 96    | 40427  | 39754                | 18899 | 18647                | 2,139107889        | 2,131863777                          | 0,008070719                         |
| 2                                        |       | 39652  |                      | 18587 |                      | 2,133318986        |                                      |                                     |
| 3                                        |       | 39183  |                      | 18455 |                      | 2,123164454        |                                      |                                     |
| 1                                        | 192   | 25486  | 24156                | 16009 | 14778                | 1,591979512        | 1,636330277                          | 0,038774265                         |
| 2                                        |       | 22662  |                      | 13708 |                      | 1,653195214        |                                      |                                     |
| 3                                        |       | 24320  |                      | 14617 |                      | 1,663816105        |                                      |                                     |

Table S15: Raw data for biofluid stability study in bovine plasma via MRM TIC area; set 3 (An = analyte; IS = internal standard).

| Pharmacokinetic - Area - Bio. Rep. Set 3 |       |        |                      |       |                      |                    |                                      |                                     |
|------------------------------------------|-------|--------|----------------------|-------|----------------------|--------------------|--------------------------------------|-------------------------------------|
| Measurement                              | t [h] | A(An)  | $\bar{X}(\text{An})$ | A(IS) | $\bar{X}(\text{IS})$ | ratio[A(An)/A(IS)] | $\bar{X}[A(\text{An})/A(\text{IS})]$ | $\sigma[A(\text{An})/A(\text{IS})]$ |
| 1                                        | 0     | 56939  | 59751                | 11294 | 11701,66667          | 5,041526474        | 5,10472959                           | 0,058693512                         |
| 2                                        |       | 62963  |                      | 12208 |                      | 5,157519659        |                                      |                                     |
| 3                                        |       | 59351  |                      | 11603 |                      | 5,115142636        |                                      |                                     |
| 1                                        | 0,25  | 48366  | 51104                | 11243 | 11828                | 4,301876723        | 4,320499421                          | 0,033488226                         |
| 2                                        |       | 53072  |                      | 12341 |                      | 4,300461875        |                                      |                                     |
| 3                                        |       | 51874  |                      | 11900 |                      | 4,359159664        |                                      |                                     |
| 1                                        | 1     | 187649 | 191459               | 55191 | 56081                | 3,399992752        | 3,413844105                          | 0,02263604                          |
| 2                                        |       | 192393 |                      | 56560 |                      | 3,40157355         |                                      |                                     |
| 3                                        |       | 194334 |                      | 56493 |                      | 3,439966013        |                                      |                                     |
| 1                                        | 4     | 29244  | 28074                | 9748  | 9584                 | 3                  | 2,931081012                          | 0,119088101                         |
| 2                                        |       | 27458  |                      | 9829  |                      | 2,793570048        |                                      |                                     |
| 3                                        |       | 27519  |                      | 9174  |                      | 2,999672989        |                                      |                                     |
| 1                                        | 24    | 248305 | 191901               | 84560 | 77012,66667          | 2,936435667        | 2,408781655                          | 0,915132888                         |
| 2                                        |       | 87762  |                      | 64909 |                      | 1,352077524        |                                      |                                     |
| 3                                        |       | 239636 |                      | 81569 |                      | 2,937831774        |                                      |                                     |
| 1                                        | 48    | 125391 | 119164               | 45830 | 42991,33333          | 2,736002618        | 2,774235165                          | 0,061373039                         |
| 2                                        |       | 117914 |                      | 43008 |                      | 2,741675967        |                                      |                                     |
| 3                                        |       | 114188 |                      | 40136 |                      | 2,845026909        |                                      |                                     |
| 1                                        | 96    | 38665  | 39595                | 22204 | 23122,33333          | 1,741352909        | 1,718735093                          | 0,086702425                         |
| 2                                        |       | 42176  |                      | 25987 |                      | 1,622965329        |                                      |                                     |
| 3                                        |       | 37945  |                      | 21176 |                      | 1,791887042        |                                      |                                     |
| 1                                        | 192   | 33653  | 31566                | 18553 | 17203,33333          | 1,813884547        | 1,836390964                          | 0,045033186                         |
| 2                                        |       | 30429  |                      | 16115 |                      | 1,888240769        |                                      |                                     |
| 3                                        |       | 30615  |                      | 16942 |                      | 1,807047574        |                                      |                                     |

Table S16: Raw data for calibration curve for biofluid stability study in bovine plasma (An = analyte; IS = internal standard).

| Calibration for Biofluid stability study - Area |           |        |                      |        |                      |              |                         |                        |
|-------------------------------------------------|-----------|--------|----------------------|--------|----------------------|--------------|-------------------------|------------------------|
| Messung                                         | c(An)     | A(An)  | $\bar{X}(\text{An})$ | A(IS)  | $\bar{X}(\text{IS})$ | ratio(An/IS) | $\bar{X}(\text{An/IS})$ | $\sigma(\text{An/IS})$ |
| 1                                               | 1 µg/ml   | 14960  | 14545                | 122563 | 123027.667           | 0.122059675  | 0.11832101              | 0.00726142             |
| 2                                               |           | 14846  |                      | 120747 |                      | 0.122951295  |                         |                        |
| 3                                               |           | 13829  |                      | 125773 |                      | 0.109952056  |                         |                        |
| 1                                               | 5 µg/ml   | 49646  | 48938                | 118456 | 111375               | 0.419109205  | 0.44349778              | 0.0542532              |
| 2                                               |           | 48255  |                      | 118937 |                      | 0.405718994  |                         |                        |
| 3                                               |           | 48914  |                      | 96732  |                      | 0.505665137  |                         |                        |
| 1                                               | 10 µg/ml  | 94084  | 94323                | 81805  | 98795                | 1.15010085   | 0.9767175               | 0.17547704             |
| 2                                               |           | 94984  |                      | 118846 |                      | 0.799219158  |                         |                        |
| 3                                               |           | 93900  |                      | 95735  |                      | 0.980832506  |                         |                        |
| 1                                               | 20 µg/ml  | 165417 | 159832               | 70232  | 71029                | 2.355293883  | 2.25059475              | 0.14398214             |
| 2                                               |           | 165518 |                      | 71650  |                      | 2.310090719  |                         |                        |
| 3                                               |           | 148560 |                      | 71204  |                      | 2.08639964   |                         |                        |
| 1                                               | 50 µg/ml  | 386639 | 395840               | 77905  | 76264.6667           | 4.962954881  | 5.1940731               | 0.23065721             |
| 2                                               |           | 398394 |                      | 76688  |                      | 5.194997914  |                         |                        |
| 3                                               |           | 402486 |                      | 74201  |                      | 5.424266519  |                         |                        |
| 1                                               | 100 µg/ml | 688096 | 686501               | 68268  | 66317                | 10.07933439  | 10.3742991              | 0.61591676             |
| 2                                               |           | 688428 |                      | 62120  |                      | 11.08222795  |                         |                        |
| 3                                               |           | 682979 |                      | 68563  |                      | 9.961334831  |                         |                        |

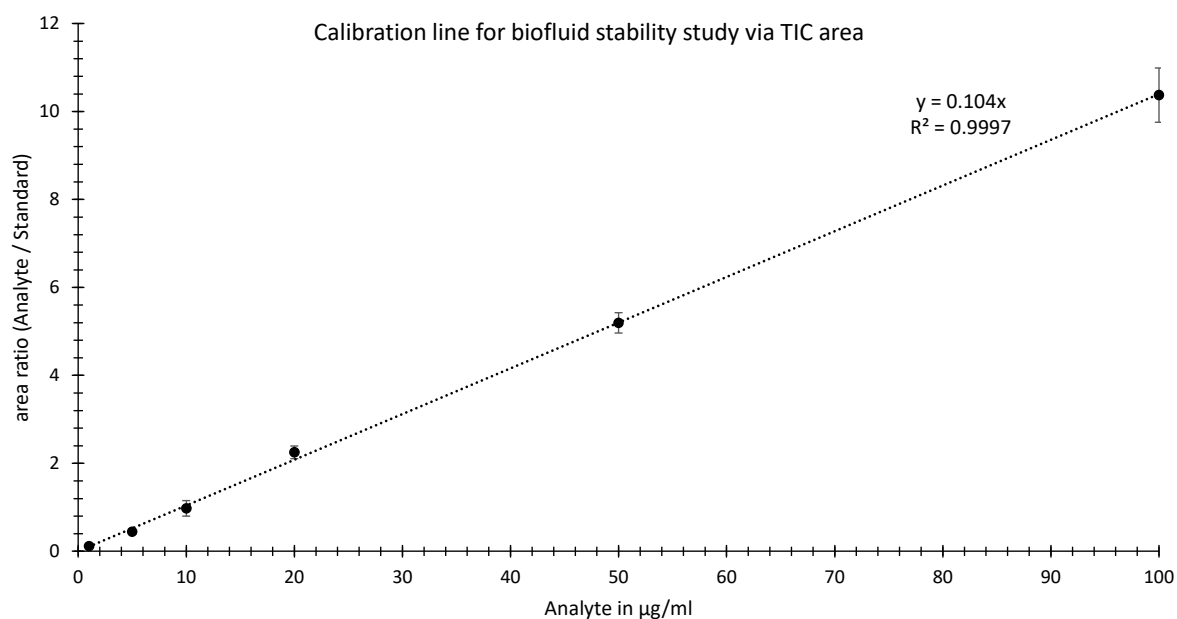

Figure S10: Calibration curve for biofluid stability study from raw data in table S16.

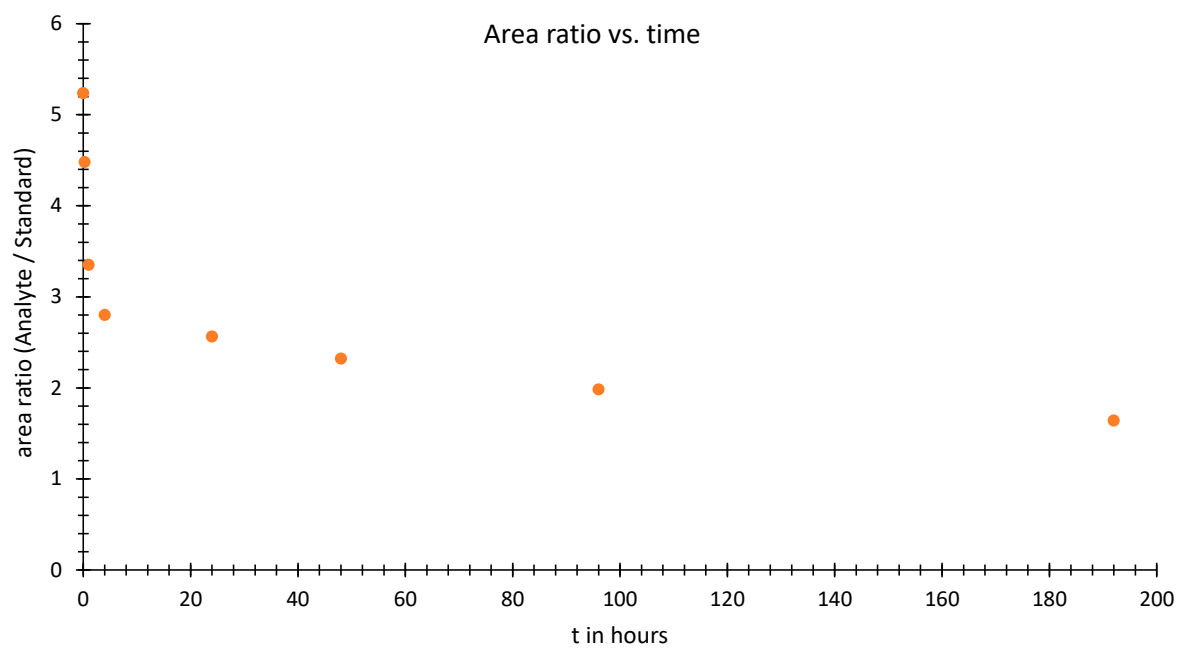

Figure S11: Mean area ratios in relation to degradation time in hours.
